# Supplementary material for: Synovial Fluid-Derived Extracellular Vesicles of Patients with Arthritides Contribute to Hippocampal Synaptic Dysfunctions and Increase with Mood Disorders Severity in Humans
Source: MDPI journal article supplement (doi:10.3390/cells11152276), 2022-07-23
Supplement: s1 [file s1]

# Supplementary Materials

## Suppl Figure 1

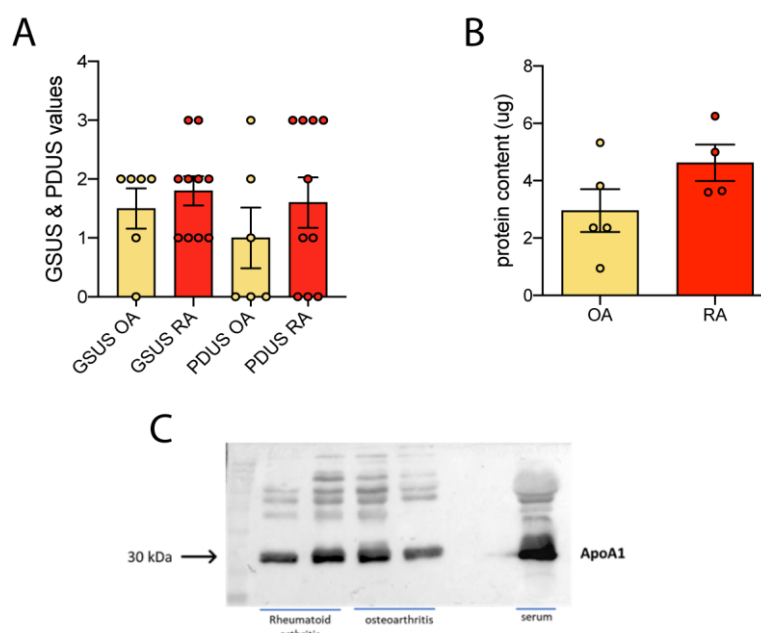

**Figure S1.** (A) PDUS and GSUS values of OA- and RA-patients indicate comparable level of inflammation between the two groups. (B) Protein content detected by micro BCA protein assay is higher in RA- respect to OA-extracted EVs, even if it is not statistically significant (Mann Whitney test, ns). (C)

## Suppl Figure 2

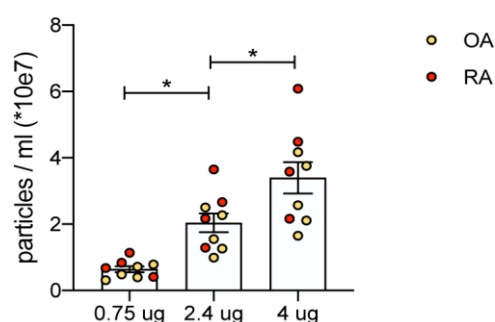

**Figure S2.** Graph representing the total amount of EVs corresponding to 0.75 - 2.4 - 4  $\mu$ g of protein; coherently, the number of particles / ml increases as the concentration is augmented. (Ordinary one-way ANOVA followed by Tukey's multiple comparison test, \*\*\*\* $p < 0.0001$ ; 0.75  $\mu$ g=9, 2.4  $\mu$ g=9, 4  $\mu$ g=9). OA data are presented in yellow; RA data are presented in red.
